# Supplementary material for: Imaging mass spectrometry: a new way to distinguish dermal contact from administration of cocaine, using a single fingerprint
Source: Royal Society of Chemistry journal article supplement (doi:10.1039/d1an00232e), 2021-01-01

**Supplemental Data** - Detection of cocaine in fingerprints: dermal contact or administration?

M. Jang<sup>a</sup>, C. Costa<sup>b</sup>, J. de Jesus<sup>c</sup>, R. Stevens<sup>d</sup>, C. Nikula<sup>d</sup>, E. Elia<sup>d</sup>, J. Bunch<sup>d</sup>, A. Bellew<sup>e</sup>, J. F. Watts<sup>f</sup>, S. Hinder<sup>f</sup>, M. J. Bailey<sup>c</sup>

**Supplemental Data Table 1.** Calculated monoisotopic masses for analytes detected.

| Analyte                          | Molecular Formula                                                 | Calculated Monoisotopic Mass ( <i>m/z</i> ) |
|----------------------------------|-------------------------------------------------------------------|---------------------------------------------|
| Cocaine                          | [C <sub>17</sub> H <sub>21</sub> NO <sub>4</sub> +H] <sup>+</sup> | 304.154                                     |
| Benzoylecgonine                  | [C <sub>16</sub> H <sub>19</sub> NO <sub>4</sub> +H] <sup>+</sup> | 290.139                                     |
| Silicon                          | Si <sup>+</sup>                                                   | 27.977                                      |
| Sodium                           | Na <sup>+</sup>                                                   | 22.990                                      |
| Ceramide (40:1(2OH))             | [C <sub>40</sub> H <sub>79</sub> NO <sub>4</sub> +H] <sup>+</sup> | 638.608                                     |
| Ditallowdimethylammonium<br>Ions | [C <sub>34</sub> H <sub>72</sub> N] <sup>+</sup>                  | 494.566                                     |
|                                  | [C <sub>36</sub> H <sub>76</sub> N] <sup>+</sup>                  | 522.597                                     |
|                                  | [C <sub>38</sub> H <sub>80</sub> N] <sup>+</sup>                  | 550.629                                     |

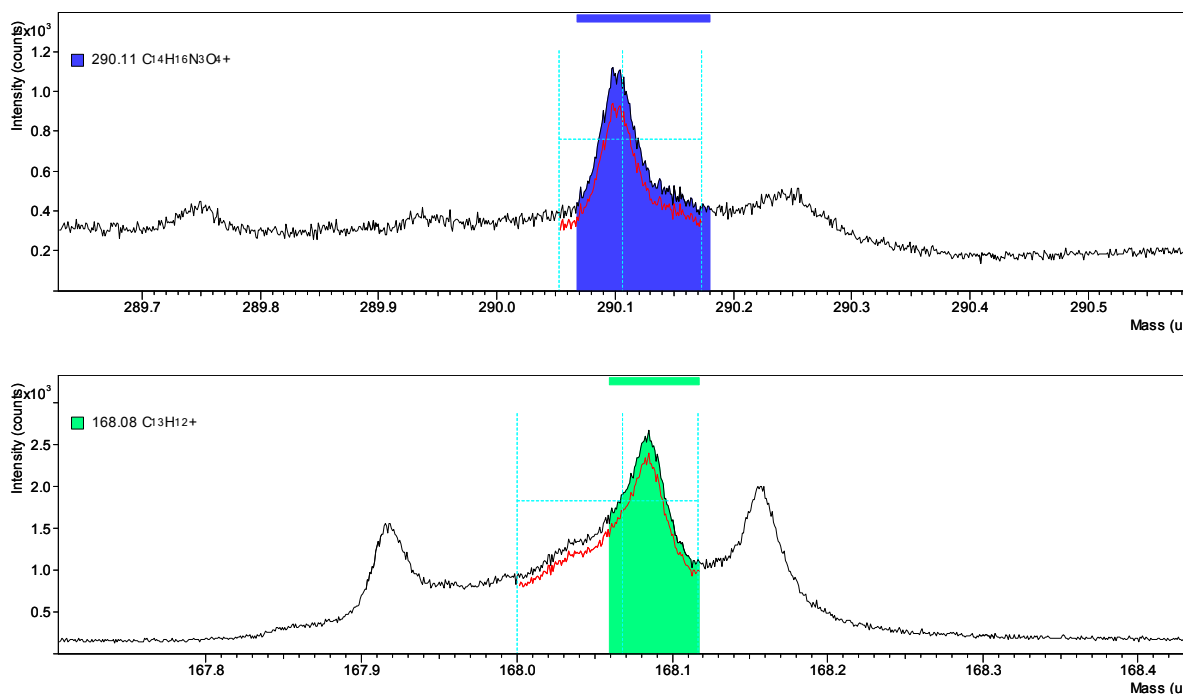

**Supplemental Data Figure 1.** ToF-SIMS spectra showing peaks at *m/z* 290.11 and *m/z* 168.08, consistent with BZE and the main BZE fragment, respectively, taken from the fingerprint collected as presented from a cocaine user.

**Supplemental Data** - Detection of cocaine in fingerprints: dermal contact or administration?  
M. Jang<sup>a</sup>, C. Costa<sup>b</sup>, J. de Jesus<sup>c</sup>, R. Stevens<sup>d</sup>, C. Nikula<sup>d</sup>, E. Elia<sup>d</sup>, J. Bunch<sup>d</sup>, A. Bellew<sup>e</sup>, J. F. Watts<sup>f</sup>, S. Hinder<sup>f</sup>, M. J. Bailey<sup>c</sup>

**Supplemental Data Table 2.** Comparison of cocaine and BZE ion images obtained with DESI, MALDI and SIMS on fingerprints collected as presented from participants who touched or ingested cocaine.

|         | Ingestion                                                                           |                                                                                     |                                                                                     | contact                                                                              |                                                                                      |                                                                                     |
|---------|-------------------------------------------------------------------------------------|-------------------------------------------------------------------------------------|-------------------------------------------------------------------------------------|--------------------------------------------------------------------------------------|--------------------------------------------------------------------------------------|-------------------------------------------------------------------------------------|
|         | DESI                                                                                | MALDI                                                                               | Water cluster SIMS                                                                  | DESI                                                                                 | MALDI                                                                                | ToF-SIMS                                                                            |
| Cocaine | 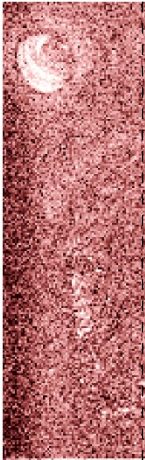   | N/D                                                                                 |   |   |   |  |
| BZE     |  |  |  |  |  | N/D                                                                                 |

**Supplemental Data Table 3.** Comparison of cocaine and BZE ion images obtained with MALDI on fingerprints collected after handwashing from participants who touched or ingested cocaine.

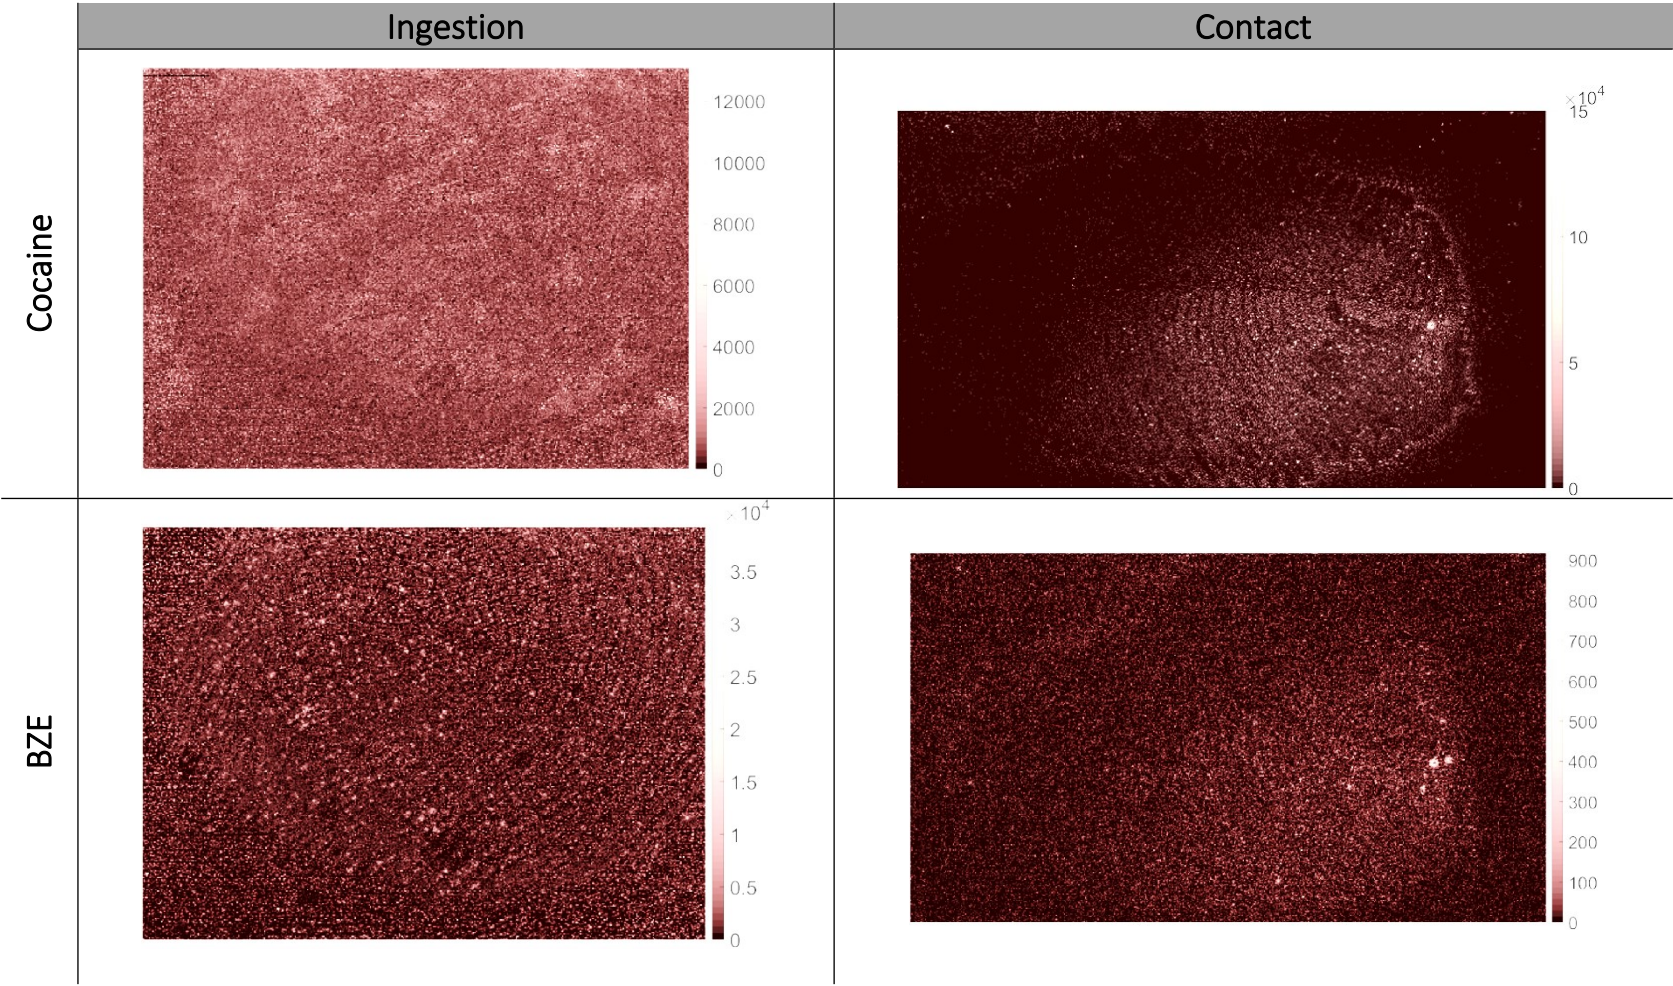

Supplement: d1an00232e1.pdf [file d1an00232e1.pdf]
